# Supplementary material for: Identifying flares in rheumatoid arthritis: reliability and construct validation of the OMERACT RA Flare Core Domain Set
Source: PubMed Central journal article supplement — RMD Open. 2016 May 26;2(1):e000225. doi: 10.1136/rmdopen-2015-000225 (PMC4885442; doi:10.1136/rmdopen-2015-000225), 2016-05-26
Supplement: rmdopen-2015-000225supp.pdf [file rmdopen-2015-000225supp.pdf]

**Supplemental Table 1.** Additional characteristics of participants by flare status.

| Variable<br>Mean (SD) or n (%) unless otherwise stated | All<br>(N=849) | Flare Classification |               |                |               |               |               |
|--------------------------------------------------------|----------------|----------------------|---------------|----------------|---------------|---------------|---------------|
|                                                        |                | Patient              |               | MD (N=718)     |               | DAS28 (N=515) |               |
|                                                        |                | Yes<br>(n=201)       | No<br>(n=648) | Yes<br>(n=233) | No<br>(n=485) | Yes<br>(n=84) | No<br>(n=431) |
| <b>Sociodemographic Characteristics</b>                |                |                      |               |                |               |               |               |
| Symptom duration at enrolment (months)                 | 5.8 (3.3)      | 5.9 (3.5)            | 5.8 (3.2)     | 6.0 (3.4)      | 5.8 (3.2)     | 5.7 (3.0)     | 5.6 (3.2)     |
| <b>RA Characteristics</b>                              |                |                      |               |                |               |               |               |
| RF+ / CCP+                                             | 550 (78%)      | 140 (79%)            | 410 (78%)     | 148 (77%)      | 327 (81%)     | 62 (83%)      | 277 (77%)     |
| Related Conditions                                     |                |                      |               |                |               |               |               |
| RA only                                                | 97 (97%)       | 184 (95%)            | 613 (97%)     | 218 (97%)      | 458 (96%)     | 81 (96%)      | 409 (96%)     |
| RA + fibromyalgia                                      | 20 (2%)        | 9 (5%)               | 11 (2%)       | 5 (2%)         | 13 (3%)       | 2 (2%)        | 13 (3%)       |
| RA + osteoarthritis                                    | 7 (1%)         | 1 (1%)               | 6 (1%)        | 1 (0%)         | 5 (1%)        | 1 (1%)        | 3 (1%)        |
| RADAI Joint Score (0-48)                               | 6.9 (7.9)      | 10.3 (10.0)          | 5.9 (6.8)     | 8.1 (8.4)      | 5.6 (7.0)     | 5.9 (6.9)     | 7.4 (8.6)     |

Sociodemographic characteristics are at enrolment; RA characteristics are at second of paired visits. At second visit, 718 patients had a second MD rating of flare and 515 had a DAS28-ESR at both visits; missing DAS28 values are due to missing ESR.

**Supplemental Table 2:** Relationships<sup>†</sup> among OMERACT RA flare domains, patient-reported tender and swollen joint counts and patient global (N=849).

|                         | Patient Global | Pain | Function | Fatigue | Participation | Stiffness | Tender Joints | Swollen Joints |
|-------------------------|----------------|------|----------|---------|---------------|-----------|---------------|----------------|
| Patient Global          | 1              | 0.88 | 0.78     | 0.66    | 0.76          | 0.80      | 0.61          | 0.51           |
| Pain                    | 0.88           | 1    | 0.84     | 0.71    | 0.81          | 0.84      | 0.62          | 0.51           |
| Function                | 0.78           | 0.84 | 1        | 0.73    | 0.90          | 0.81      | 0.59          | 0.46           |
| Fatigue                 | 0.66           | 0.71 | 0.73     | 1       | 0.75          | 0.70      | 0.52          | 0.39           |
| Participation           | 0.76           | 0.81 | 0.90     | 0.75    | 1             | 0.80      | 0.56          | 0.44           |
| Stiffness               | 0.80           | 0.84 | 0.81     | 0.70    | 0.80          | 1         | 0.62          | 0.53           |
| Patient tender joints*  | 0.61           | 0.62 | 0.59     | 0.52    | 0.56          | 0.62      | 1             | 0.61           |
| Patient swollen joints* | 0.51           | 0.51 | 0.46     | 0.39    | 0.44          | 0.53      | 0.61          | 1              |

<sup>†</sup>Spearman's rho; \*from a total of 40

# Supplemental Figure 1.

## OMERACT PRELIMINARY FLARE ASSESSMENT QUESTIONNAIRE

(Draft version 1.0)

1. Since your last visit, is your rheumatoid arthritis (RA): (please check box)

much worse – worse – somewhat worse – the same – somewhat better – better – much better

2. Are you having a flare (flare-up) of rheumatoid arthritis at this time?

Yes  No   
If no, please go to section 2

3. If yes, please circle a number to indicate the severity of your flare during the last week.

No Flare 0 1 2 3 4 5 6 7 8 9 10 Extremely Bad

4. If yes, how long has this flare of your RA been going on?

1-3 days  4-7 days  8-14 days  more than 14 days

### Section 2: Describe your rheumatoid arthritis

1. PAIN:

Circle the number that best describes the pain you felt due to your rheumatoid arthritis during the last week:

No Pain 0 1 2 3 4 5 6 7 8 9 10 Extreme Pain

2. FUNCTION:

Circle the number that best describes the difficulty you had in doing physical activities (such as using your hands, walking or running, dressing, preparing meals, etc.) due to your rheumatoid arthritis during the last week:

No Difficulty 0 1 2 3 4 5 6 7 8 9 10 Extreme Difficulty

3. FATIGUE:

Circle the number that best describes how much fatigue you felt due to your rheumatoid arthritis during the last week:

No Fatigue 0 1 2 3 4 5 6 7 8 9 10 Extremely Exhausted

4. STIFFNESS:

Circle the number that best describes the stiffness (all over or in your joints) you felt due to your rheumatoid arthritis during the last week:

No Stiffness 0 1 2 3 4 5 6 7 8 9 10 Extreme Stiffness

5. PARTICIPATION:

Considering how active your rheumatoid arthritis has been, please circle the number that best describes how much difficulty you have had during the last week, when taking part in activities such as work, family life, social events that are **typical** for you:

No Difficulty 0 1 2 3 4 5 6 7 8 9 10 Extreme Difficulty

6. COPING/MANAGING YOUR LIFE:

Considering your rheumatoid arthritis overall, please circle how well you have coped (managed, dealt with, made do) with your disease during the last week:

Very Well 0 1 2 3 4 5 6 7 8 9 10 Very Poorly

**ROC Plot**  
Approximate area under curve = 0.716

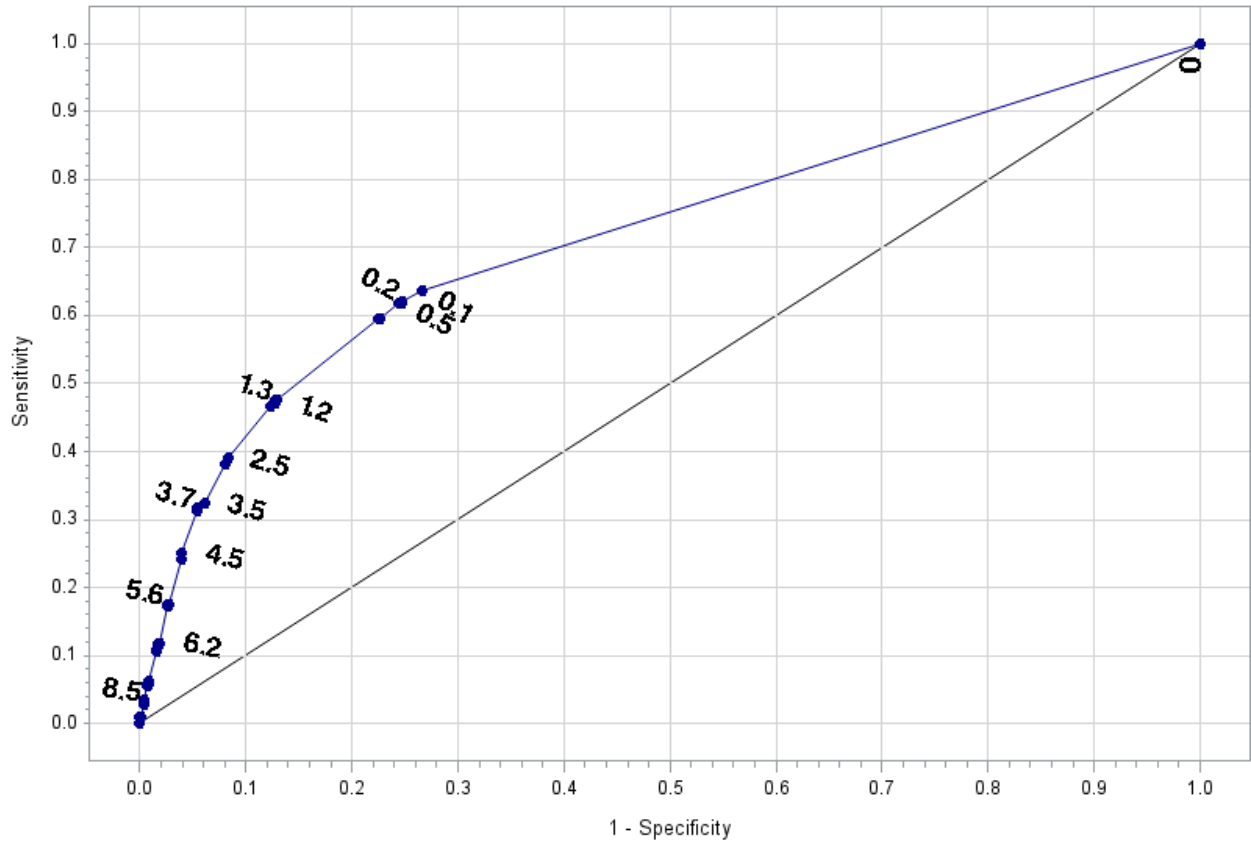

| Threshold | Sensitivity | Specificity | Distance from Perfect Marker |
|-----------|-------------|-------------|------------------------------|
| 0.0       | 0.63580     | 0.73426     | 0.45084                      |
| 0.1       | 0.62037     | 0.7524      | 0.45324                      |
| 0.2       | 0.61728     | 0.7524      | 0.45583                      |
| 0.3       | 0.61728     | 0.7556      | 0.45409                      |
| 0.5       | 0.59568     | 0.77375     | 0.46332                      |
| 0.7       | 0.59568     | 0.77481     | 0.46280                      |
| 1.0       | 0.47531     | 0.87086     | 0.54035                      |

**Supplemental Figure 2a.** Thresholds for MD classification of RA Flare compared to patient report of flare for 1261 patients in CATCH with flare data between Nov 2011 and May 2013.

**ROC Plot**  
Approximate area under curve = 0.730

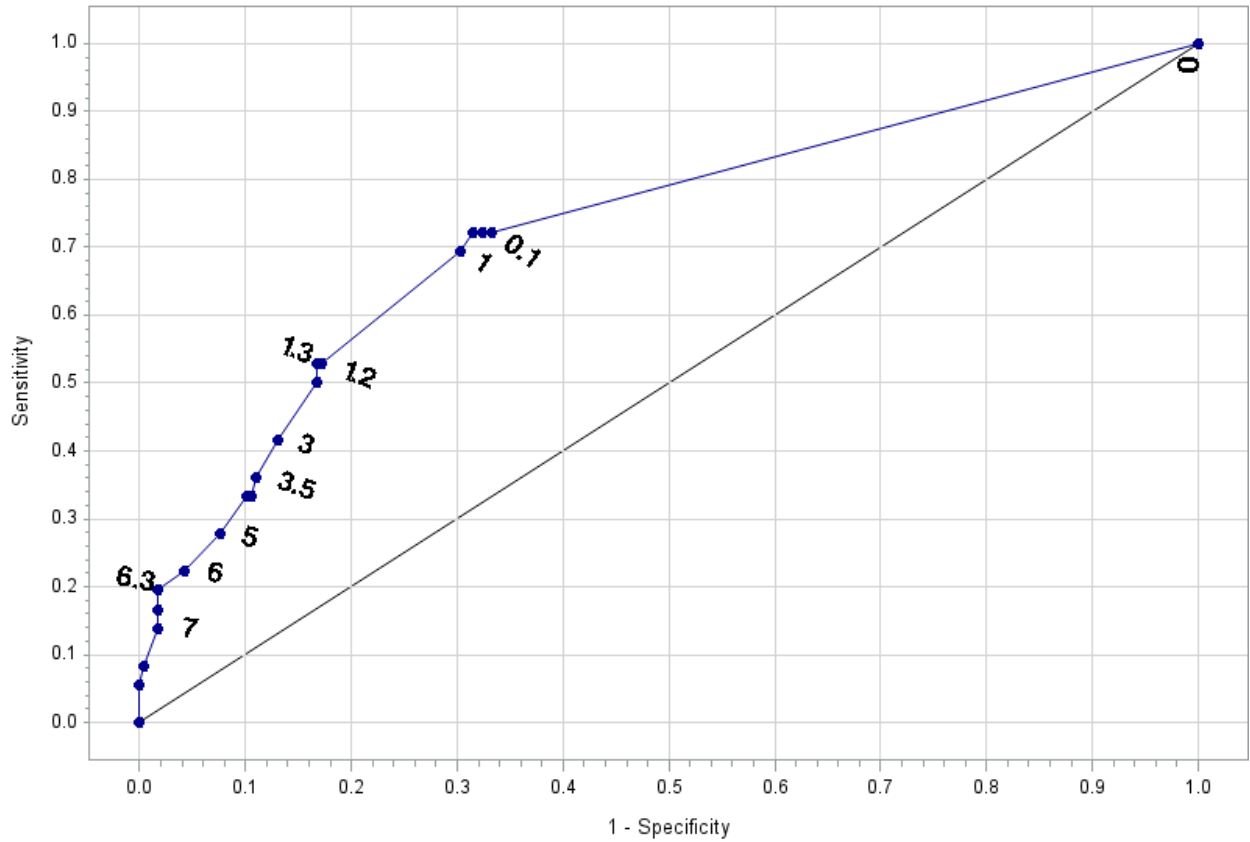

| Threshold | Sensitivity | Specificity | Distance from Perfect Marker |
|-----------|-------------|-------------|------------------------------|
| 0         | 0.72222     | 0.66807     | 0.43283                      |
| 0.1       | 0.72222     | 0.67647     | 0.42642                      |
| 0.3       | 0.72222     | 0.68487     | 0.42008                      |
| 0.5       | 0.69444     | 0.69748     | 0.42998                      |
| 1         | 0.52778     | 0.82773     | 0.50266                      |

**Supplemental Figure 2b.** Thresholds for MD classification of RA Flare compared to DAS28 1.2/0.6 in 274 patients with flare data between Nov 2011 and May 2013.

**ROC Plot**  
Approximate area under curve = 0.713

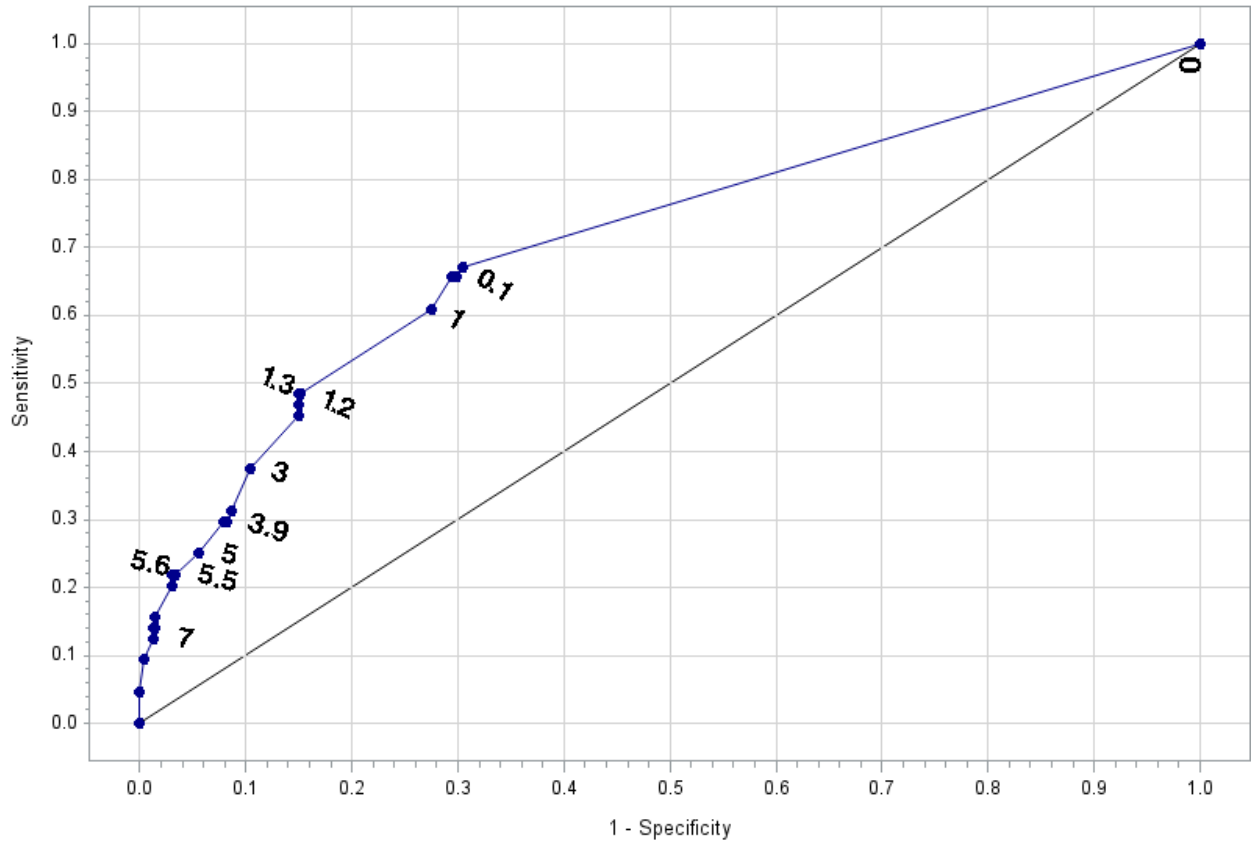

| Threshold | Sensitivity | Specificity | Distance from Perfect Marker |
|-----------|-------------|-------------|------------------------------|
| 0         | 0.67188     | 0.69592     | 0.44736                      |
| 0.1       | 0.65625     | 0.70204     | 0.45491                      |
| 0.3       | 0.65625     | 0.70612     | 0.45225                      |
| 0.5       | 0.60938     | 0.72449     | 0.47801                      |
| 1         | 0.48438     | 0.84898     | 0.53729                      |

**Figure 2c.** Thresholds for MD classification of RA Flare compared to DAS28 1.2/0.6 criterion in 554 CATCH patients with MD flare and DAS28 values between Nov 2011 and May 2013.
